# Supplementary material
Source: HighWire-hosted journal article supplement (https://cmaj.ca/highwire/filestream/74666/field_highwire_adjunct_files/8/190385-res-8-at.pdf)
Supplement: 190385-res-8-at.pdf [file 190385-res-8-at.pdf]

**Appendix 8 (as supplied by the authors): Sensitivity tests with overall sample on all-cause premature mortality, fully adjusted Cox models**

|                         | Food-secure<br>(reference) | Marginally food-<br>insecure | Moderately food-<br>insecure | Severely food-<br>insecure | N          |
|-------------------------|----------------------------|------------------------------|------------------------------|----------------------------|------------|
| Original                | 1.00 (ref)                 | 1.10 (1.03 - 1.18)           | 1.11 (1.05 - 1.18)           | 1.37 (1.27 - 1.47)         | 3,390,500  |
| Excluded Nunavut        | 1.00 (ref)                 | 1.10 (1.03 - 1.18)           | 1.11 (1.04 - 1.17)           | 1.36 (1.26 - 1.46)         | 3,369,000  |
| Excluded Quebec         | 1.00 (ref)                 | 1.10 (1.02 - 1.19)           | 1.11 (1.04 - 1.19)           | 1.40 (1.29 - 1.52)         | 2,588,100  |
| Excluded 2017           | 1.00 (ref)                 | 1.10 (1.03 - 1.18)           | 1.11 (1.05 - 1.18)           | 1.36 (1.26 - 1.46)         | 3,346,900  |
| Income<\$40,000         | 1.00 (ref)                 | 1.09 (1.00 - 1.18)           | 1.09 (1.01 - 1.17)           | 1.35 (1.24 - 1.47)         | 888,200    |
| Exit at 12th year       | 1.00 (ref)                 | 1.10 (1.03 - 1.18)           | 1.11 (1.05 - 1.18)           | 1.37 (1.27 - 1.47)         | 3,390,500  |
| Food insecurity imputed | 1.00 (ref)                 | 1.10 (1.02 - 1.17)           | 1.11 (1.05 - 1.18)           | 1.35 (1.25 - 1.46)         | 3,810,300  |
| Weighted                | 1.00 (ref)                 | 1.11 (0.96 - 1.27)           | 1.22 (1.08 - 1.37)           | 1.22 (1.05 - 1.42)         | 3,390,500  |
| Month-based             | 1.00 (ref)                 | 1.11 (1.03 - 1.19)           | 1.12 (1.06 - 1.19)           | 1.39 (1.29 - 1.50)         | 40,611,300 |

Note: Hazard ratios estimated from fully adjusted Cox proportional hazard models on the overall sample of adults 18-82 years old at interview. The models adjusted for respondent's sex, age at interview, household income, highest education in household, household type, housing tenure, acute care hospitalization in the past two years, number of self-reported chronic conditions, smoker status, and past-year alcohol consumption history. Respondent's sex and age at interview, hospitalization history in the past two years, and number of self-reported chronic conditions were included as strata. In the sensitivity tests, we experimented excluding Nunavut, the territory with a substantially higher-than-average prevalence of food insecurity and lower life expectancy. We also tried excluding Quebec, the province accounting for one-quarter of the national hospitalization records but not included in DAD. We then tried excluding 2017, the year with no income data. We also replicated the model on low income sample with household income less than \$40,000. We also changed the exit cut-off from the thirteenth year to the twelfth year so as to remove potential bias induced by outliers during long-term follow-up. We then tried imputing food insecurity status for the 12.7 percent of the households initially excluded from our sample due to missing food security status; we used 20-iteration chained multiple imputation method controlling for the same covariates used to predict mortality. We further tried applying the sample weights to the model. Finally, we replaced person-years with person-months to ensure the results were not sensitive to the choice of time scale.
